# Supplementary material
Source: PubMed Central journal article supplement (PMC6003618)
Supplement: NIHMS873483-supplement-Supplement_Part_2.pdf [file NIHMS873483-supplement-Supplement_Part_2.pdf]

SMILES document

| Comp. | SMILE                                                                                                                   | Vasodilation<br>EC50<br>( $\mu\text{M}$ ) | In vitro<br>antiparasitic<br>IC50 ( $\mu\text{M}$ ) | Survival %<br>(In vivo<br>cerebral<br>malaria<br>model) |
|-------|-------------------------------------------------------------------------------------------------------------------------|-------------------------------------------|-----------------------------------------------------|---------------------------------------------------------|
| 10    | <chem>[O-][N+]1=C(C(N)=O)C(CN(C)CCO[C@H]([C@@H]2C)O[C@@H]3O[C@@](OO4)(C)CCC5[C@@]34C2CC[C@H]5C)=NO1</chem>              | 1.4 $\pm$ 0.2                             | 16 $\pm$ 6                                          | 51.6 %                                                  |
| 11    | <chem>[O-][N+]1=C(C#N)C(CN(C)CCO[C@H]([C@@H]2C)O[C@@H]3O[C@@](OO4)(C)CCC5[C@@]34C2CC[C@H]5C)=NO1</chem>                 | 0.023 $\pm$ 0.004                         | 18 $\pm$ 2                                          | -                                                       |
| 12    | <chem>[O-][N+]1=C(S(C2=CC=CC=C2)(=O)=O)C(CN(C)CCO[C@H]([C@@H]3C)O[C@@H]4O[C@@](OO5)(C)CC6[C@@]45C3CC[C@H]6C)=NO1</chem> | 0.41 $\pm$ 0.05                           | 14 $\pm$ 3                                          | -                                                       |
| 18    | <chem>O=C(CCC(OCO/N=[N+](N1CCCC1)\[O-])=O)O[C@H]([C@@H]2C)O[C@H]3O[C@@](OO4)(C)CCC5[C@@]34C2CC[C@H]5C</chem>            | 0.0036 $\pm$<br>0.0004                    | 15 $\pm$ 5                                          | -                                                       |
